# Supplementary material for: Recessive mutations in ATP8A2 cause severe hypotonia, cognitive impairment, hyperkinetic movement disorders and progressive optic atrophy
Source: Springer Nature journal article supplement (doi:10.1186/s13023-018-0825-3), 2018-05-31

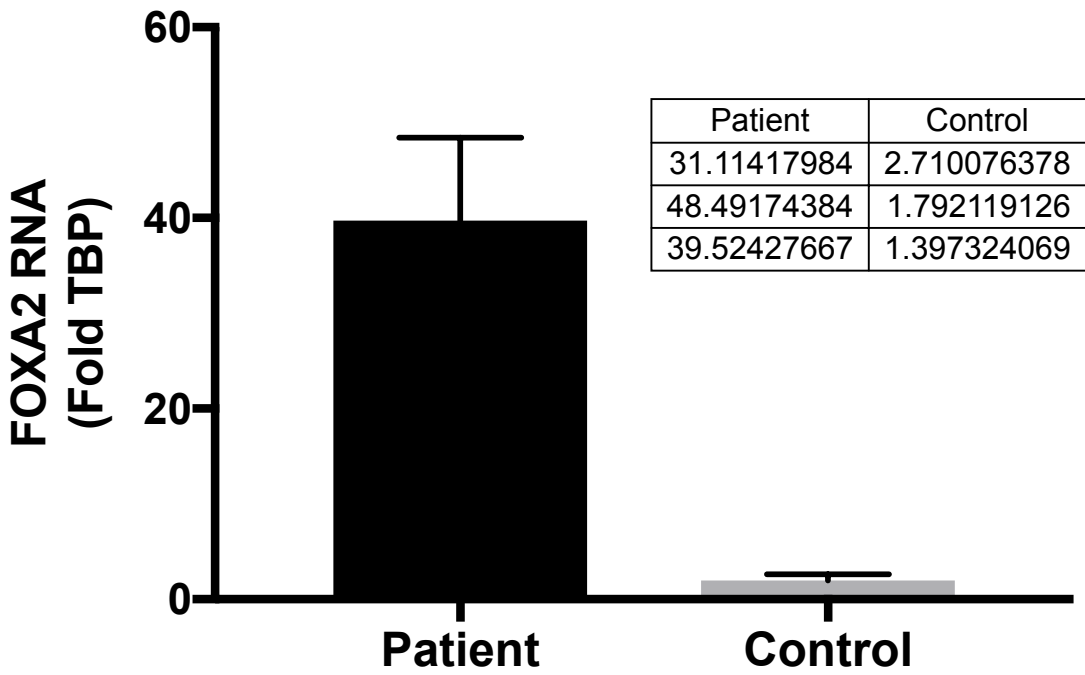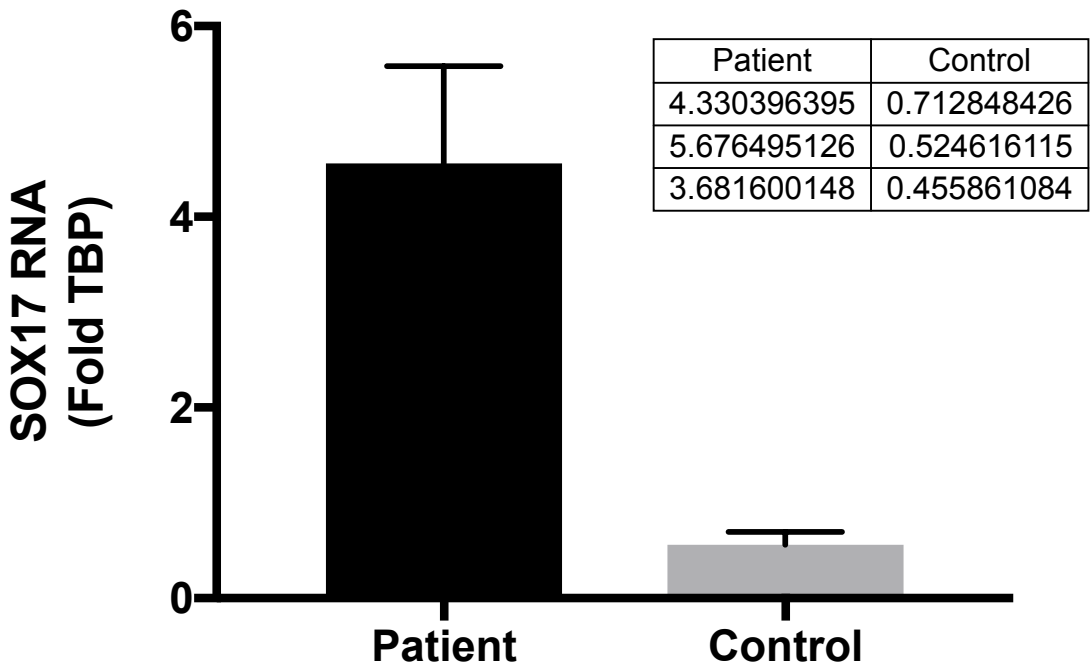

Supplement: MOESM6 [file 15956708]
